# Supplementary material for: Ballistic and Blast-Relevant, High-Rate Material Properties of Physically and Chemically Crosslinked Hydrogels
Source: Springer Nature journal article supplement (doi:10.1007/s11340-024-01043-3), 2024-03-04
Supplement: MOESM1 [file 26817432]

## Supplementary Information

### Ballistic and Blast-Relevant, High-Rate Material Properties of Physically and Chemically Crosslinked Hydrogels

Elizabeth C. Bremer-Sai<sup>1</sup>, Jin Yang<sup>2</sup>, Alexander McGhee<sup>1</sup>, Christian Franck<sup>1,\*</sup>

<sup>1</sup>Department of Mechanical Engineering, University of Wisconsin – Madison, Madison, WI 53706

<sup>2</sup>Department of Aerospace Engineering & Engineering Mechanics, The University of Texas at Austin, TX

\*Corresponding Author: [cfranck@wisc.edu](mailto:cfranck@wisc.edu)

**Supplementary Table 1:**

| Material           | Model | Concentration[%] | $G_{\infty}$ [kPa] | $G$ [kPa]    | $\mu$ [Pa·s] | $\alpha$    | NRMSE                                         |
|--------------------|-------|------------------|--------------------|--------------|--------------|-------------|-----------------------------------------------|
| Polyacrylamide[14] | qKV   | 3 (v/v)          | 0.57               | -            | 0.060±0.057  | 0.960±0.058 | $4.05 \times 10^{-3} \pm 2.02 \times 10^{-3}$ |
|                    | NHKV  | 3 (v/v)          | 0.57               | 8.31±0.43    | 0.093±0.073  | -           | $4.10 \times 10^{-3} \pm 2.05 \times 10^{-3}$ |
|                    | qKV   | 8 (v/v)          | 2.77               | -            | 0.186±0.194  | 0.480±0.140 | $2.58 \times 10^{-3} \pm 1.89 \times 10^{-3}$ |
|                    | NHKV  | 8 (v/v)          | 2.77               | 15.09±4.35   | 0.209±0.180  | -           | $3.13 \times 10^{-3} \pm 2.19 \times 10^{-3}$ |
| Agarose[16]        | qKV   | 0.5 (w/w)        | 2.11±0.11          | -            | 0.054±0.015  | 0.880±0.147 | $9.85 \times 10^{-3} \pm 1.66 \times 10^{-2}$ |
|                    | NHKV  | 0.5 (w/w)        | 2.11±0.11          | 27.82±8.56   | 0.170±0.092  | -           | $8.29 \times 10^{-3} \pm 1.06 \times 10^{-2}$ |
|                    | qKV   | 1 (w/w)          | 12.38±0.14         | -            | 0.210±0.032  | 0.460±0.051 | $3.86 \times 10^{-3} \pm 6.64 \times 10^{-3}$ |
|                    | NHKV  | 1 (w/w)          | 12.38±0.14         | 58.12±9.38   | 0.300±0.092  | -           | $3.70 \times 10^{-3} \pm 6.30 \times 10^{-3}$ |
|                    | qKV   | 2.5 (w/w)        | 81.05±0.17         | -            | 0.190±0.105  | 0.104±0.006 | $2.24 \times 10^{-3} \pm 2.05 \times 10^{-3}$ |
|                    | NHKV  | 2.5 (w/w)        | 81.05±0.17         | 114.64±4.85  | 0.110±0.046  | -           | $1.84 \times 10^{-3} \pm 1.78 \times 10^{-3}$ |
|                    | NHKV  | 5 (w/w)          | 333.63±0.11        | 282.37±22.83 | 0.500±0.065  | -           | $1.44 \times 10^{-2} \pm 7.61 \times 10^{-3}$ |
| Gelatin            | qKV   | 6 (w/v)          | 0.74±0.02          | -            | 0.023±0.025  | 5.481±1.329 | $1.37 \times 10^{-3} \pm 2.03 \times 10^{-3}$ |
|                    | NHKV  | 6 (w/v)          | 0.74±0.02          | 12.78±3.69   | 0.027±0.022  | -           | $1.36 \times 10^{-3} \pm 1.86 \times 10^{-3}$ |
|                    | qKV   | 10 (w/v)         | 3.08±0.01          | -            | 0.098±0.040  | 4.053±0.792 | $1.37 \times 10^{-3} \pm 1.96 \times 10^{-3}$ |
|                    | NHKV  | 10 (w/v)         | 3.08±0.01          | 29.85±6.20   | 0.055±0.061  | -           | $1.43 \times 10^{-3} \pm 1.95 \times 10^{-3}$ |
|                    | qKV   | 14 (w/v)         | 6.71±0.03          | -            | 0.018±0.007  | 7.106±1.411 | $1.74 \times 10^{-3} \pm 2.29 \times 10^{-3}$ |
|                    | NHKV  | 14 (w/v)         | 6.71±0.03          | 101.50±4.01  | 0.166±0.208  | -           | $8.92 \times 10^{-4} \pm 9.66 \times 10^{-4}$ |

Table S1: Summary of both qKV and NHKV IMR-fitted viscoelastic material properties for PAAm, Agarose, and Gelatin over a strain rate envelope of  $10^3 \text{ s}^{-1} \sim 10^6 \text{ s}^{-1}$  and the associated NRMSE values for each model.
